# Supplementary material
Source: PubMed Central journal article supplement (PMC3277528)
Supplement: 1115025109_pnas.1115025109_SI.pdf [file 1115025109_pnas.1115025109_SI.pdf]

# Supporting Information

Lin et al. 10.1073/pnas.1115025109

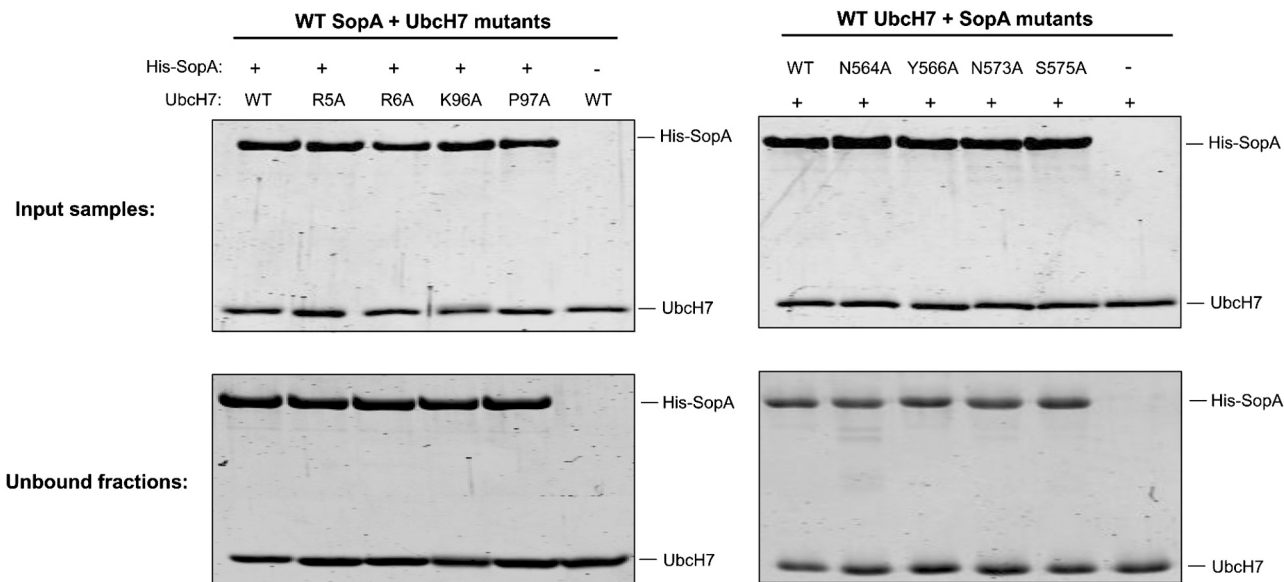

**Fig. S1.** SopA/Ubch7 pulldown experiment. His-SopA was incubated with Ubch7 in a 1:1 molar ratio for 30 min at 4 °C. Co<sup>2+</sup> beads were then added to the mixture and incubated for 10 min before centrifugation. After extensive washing, proteins bound to the beads were analyzed on SDS-PAGE with Coomassie blue staining and shown in Fig. 2B in the main text. The input samples and unbound fractions are shown here per request of a reviewer.



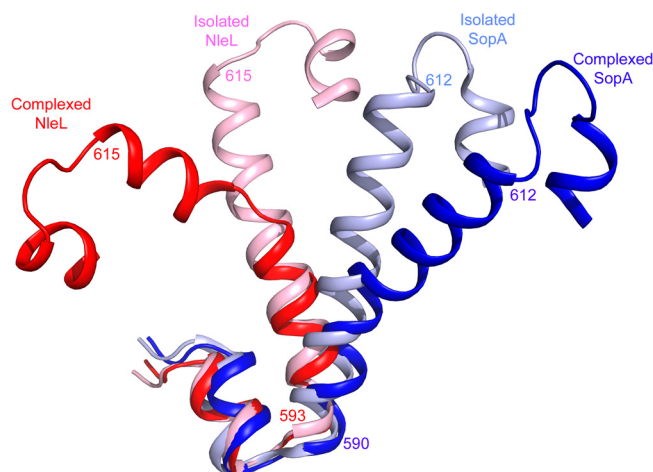

**Fig. S4.** Conformational flexibility of the hinge helix. Structures UbcH7/NleL, UbcH7/SopA, and two representative structures of isolated SopA (PDB code: 2QYU) and NleL (PDB code: 3NB2 chain C) are superimposed via the N-lobes and the  $\beta$ -helix domains. The structures of hinge helix are shown to demonstrate the different conformations of this region observed in these structures.

Table S1. Crystallographic and refinement statistics

\*Numbers in brackets refer to the highest resolution shell.

<sup>†</sup>A random 5% of the reflection data was omitted in the refinement and used to calculate  $R_{\text{free}}$ .

<sup>†</sup>At this resolution, the atomic B factors cannot be accurately determined and should only be used to analyze which parts of the structure are relatively ordered.

<sup>§</sup>Numbers in square brackets are the percentiles among structures of comparable resolution. 100th percentile is the best; 0th percentile is the worst.

<sup>†</sup>MolProbity score is defined as the following:  $0.42574 \cdot \log(1 + \text{clashscore}) + 0.32996 \cdot \log(1 + \max(0, \text{pctRotOut} - 1)) + 0.24979 \cdot \log(1 + \max(0, 100 - \text{pctRamaFavored} - 2)) + 0.5$
